# Supplementary material
Source: publisher figshare collection journal article supplement (https://gsajournals.figshare.com/ndownloader/files/28398909)
Supplement: Supplementary file 1 [file 28398909]

## Sheet: Sheet1
GO ID	Table S3. Gene ontology enrichment terms summarized by REVIGO for the group of up-regulated genes in stress versus control comparisons
#REF!	Description	p-value	No. of matches
#REF!	cofactor metabolic process	1.52e-08	98
#REF!	glutathione metabolic process	3.08e-08	36
#REF!	response to stress	2.81e-06	393
#REF!	cellular modified amino acid metabolic process	4.78e-06	48
#REF!	proteolysis	2.51e-05	301
#REF!	sulfur compound metabolic process	2.95e-05	73
#REF!	cellular catabolic process	0.000489	284
#REF!	catabolic process	0.00406	315
#REF!	response to starvation	0.0178	61
#REF!	protein folding	0.02	54
#REF!
#REF!
#REF!
#REF!
#REF!
#REF!
#REF!
#REF!
Term ID
GO:0051186
GO:0006749
GO:0006950
GO:0006575
GO:0006508
GO:0006790
GO:0044248
GO:0009056
GO:0042594
GO:0006457
